# Supplementary material
Source: PubMed Central journal article supplement (PMC5056160)
Supplement: NIHMS812113-supplement-Supp_Table_S1.pdf [file NIHMS812113-supplement-Supp_Table_S1.pdf]

**Supplemental Table 1.** Cytokine levels in media on day 2 of culture. Represented as the mean ( $\pm$  SE) cytokine secretion (pg/mL) in media of blastocysts co-cultured alone or with peripheral blood NK cells, monocytes, NK cells + monocytes (Mo), macrophages, or NK cells + macrophages (M $\phi$ ); n=5-8. ND denotes levels not detected by the assay.

|                           | <b>Blast only</b> | <b>NK Cell</b>  | <b>Monocyte</b>   | <b>NK+Mo</b>      | <b>Macrophage</b>  | <b>NK+M<math>\phi</math></b> |
|---------------------------|-------------------|-----------------|-------------------|-------------------|--------------------|------------------------------|
| CSF2<br>(GM-CSF)          | ND                | ND              | 12 ( $\pm$ 4)     | 131 ( $\pm$ 31)   | ND                 | 5 ( $\pm$ 3)                 |
| CSF3<br>(G-CSF)           | ND                | ND              | 7 ( $\pm$ 4)      | 141 ( $\pm$ 43)   | 12 ( $\pm$ 5)      | 79 ( $\pm$ 63)               |
| TNF                       | ND                | 6 ( $\pm$ 6)    | 30 ( $\pm$ 11)    | 91 ( $\pm$ 36)    | ND                 | ND                           |
| IL-6                      | ND                | 9 ( $\pm$ 2)    | 42 ( $\pm$ 12)    | 534 ( $\pm$ 113)  | 506 ( $\pm$ 323)   | 1182 ( $\pm$ 412)            |
| CXCL8<br>(IL-8)           | ND                | 180 ( $\pm$ 49) | 2639 ( $\pm$ 648) | 7097 ( $\pm$ 586) | 5427 ( $\pm$ 772)  | 7206 ( $\pm$ 870)            |
| IL-12                     | 12 ( $\pm$ 10)    | 11 ( $\pm$ 8)   | ND                | 24 ( $\pm$ 4)     | 12 ( $\pm$ 5)      | 94 ( $\pm$ 75)               |
| CCL2<br>(MCP-1)           | ND                | 82 ( $\pm$ 16)  | 568 ( $\pm$ 126)  | 1753 ( $\pm$ 215) | 3553 ( $\pm$ 1056) | 4924 ( $\pm$ 907)            |
| CCL3<br>(MIP-1 $\alpha$ ) | ND                | 6 ( $\pm$ 2)    | 201 ( $\pm$ 62)   | 908 ( $\pm$ 181)  | 3 ( $\pm$ 1)       | 12 ( $\pm$ 7)                |
| CCL4<br>(MIP-1 $\beta$ )  | ND                | ND              | 5 ( $\pm$ 3)      | 32 ( $\pm$ 18)    | ND                 | ND                           |
